# Supplementary material for: Identification and Characterization of Long Non-Coding RNAs: Implicating Insights into Their Regulatory Role in Kiwifruit Ripening and Softening during Low-Temperature Storage
Source: MDPI journal article supplement (doi:10.3390/plants12051070), 2023-02-27
Supplement: s1 [file s1]

Table S11 List of qRT-PCR primers used in the study

| Gene_ID        | Primer sequence (5'-3')  |                        | Description                                         |
|----------------|--------------------------|------------------------|-----------------------------------------------------|
|                | Upstream                 | Downstream             |                                                     |
| Acc29506       | GTGGAAGTGAAGGAGAGGAATG   | CGAATGGTACACGGGCTATTT  | Zinc transporter                                    |
| Acc17513       | ACGATGTCTCTGGTGCTAATG    | CAGGGTCCGCAAATTCAAATAC | Cytochrome b561 and DOMON domain-containing protein |
| Acc08288       | CGTTGTGAAGAATGGTGTCTAAG  | ATTCCAGTGGCCTTCCAATAG  | NAC                                                 |
| Acc20977       | AGGAGCTTGTGAGTGTGATAAA   | TCTGATAGGACCCTGTTGTAGA | Beta-amyrin                                         |
| Acc18497       | CGATAGAGTCTCCCTTGCTTTAAT | CAGTACCATCTCACGCAACTC  | Late embryogenesis abundant protein                 |
| Acc28118       | CATGACTCCGGCCAGTATAAC    | CCGAGTACCACTCTAGGAAGAA | Beta-amylase                                        |
| Acc06893       | ATGGCACTTGAAGCACTCA      | GTAGGACGGGAAGGATTTGTC  | Zinc finger protein                                 |
| TCONS_00029828 | GAGGGCTAAGAAGAGGCACA     | TGGGTTTCAGTCGTTGTATCTC | Long non-coding RNA                                 |
| TCONS_00049448 | TTCTTGCCTTCGCCTTCT       | AATGTCTTTGCCCTTCCG     | Long non-coding RNA                                 |
| TCONS_00079504 | TGTGGAGGAAGAAGAAGAAGAAG  | ACTCGGTAAGTGGTGAAACAG  | Long non-coding RNA                                 |
| TCONS_00004869 | TGGGAACTCACTCAAATCC      | TTGGCAAGGCTATTCAGAAG   | Long non-coding RNA                                 |
